# Supplementary material for: BNT162b2 vaccine induces neutralizing antibodies and poly-specific T cells in humans
Source: Springer Nature journal article supplement (doi:10.1038/s41586-021-03653-6), 2021-05-27
Supplement: 41586_2021_3653_MOESM1_ESM.pdf [file 41586_2021_3653_MOESM1_ESM.pdf]

**Supplementary information**

---

**BNT162b2 vaccine induces neutralizing antibodies and poly-specific T cells in humans**

---

In the format provided by the authors and unedited

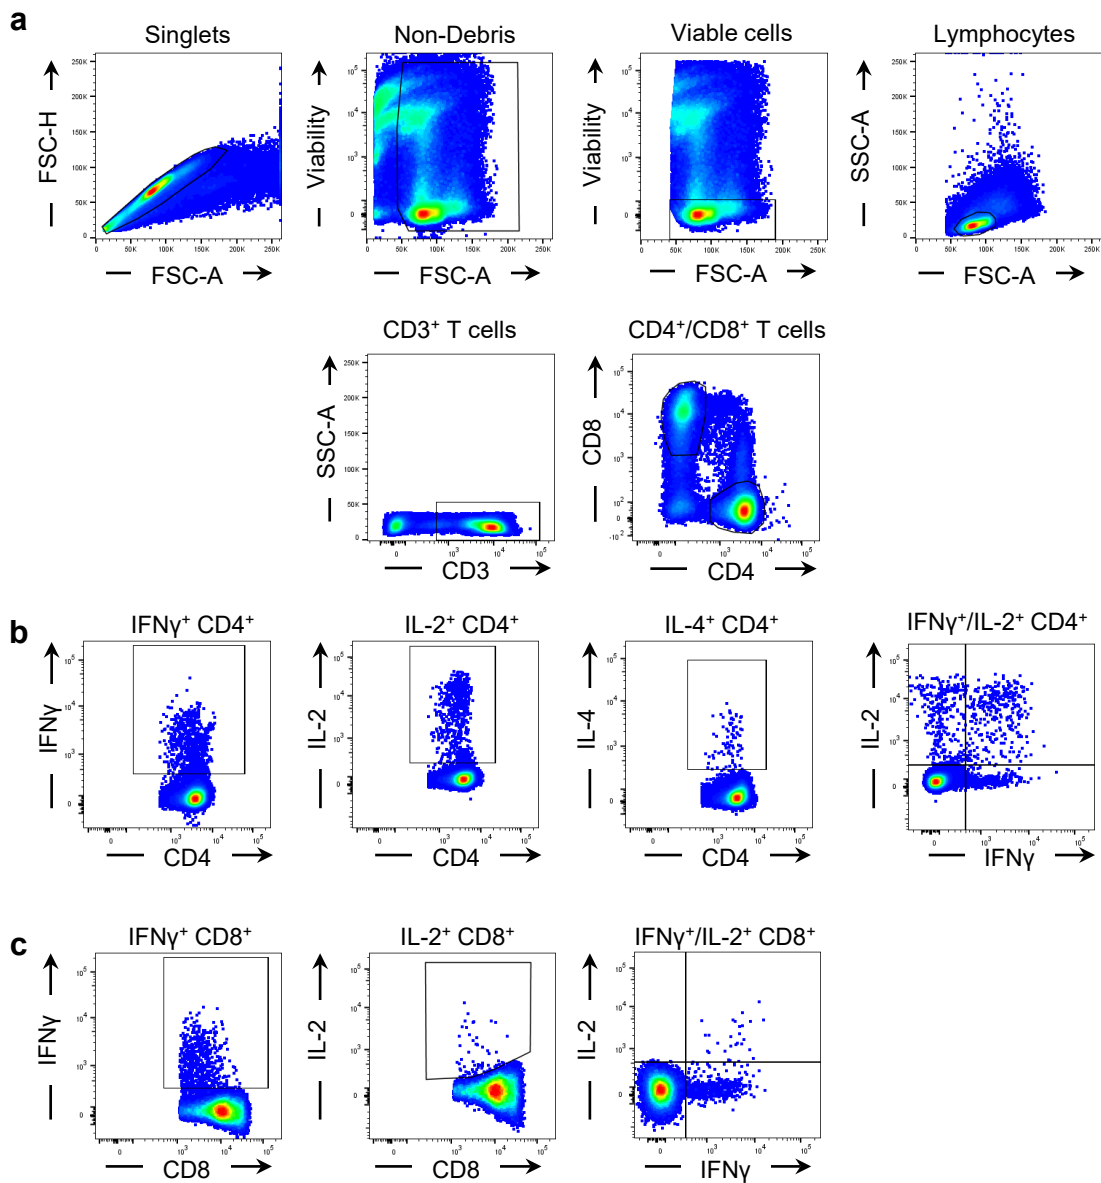

**Supplementary Figure 1 | Flow cytometry gating strategy for cytokine analysis by flow cytometry.**

Gating strategy for identification of IFN $\gamma$ , IL-2 and IL-4 secreting T cells in PBMC samples. **a**, CD4 $^+$  and CD8 $^+$  T cells were gated within single, viable lymphocytes. **b, c**, Gating of IFN $\gamma$ , IL-2 and IL-4 in CD4 $^+$  T cells (**b**), and IFN $\gamma$  and IL-2 in CD8 $^+$  T cells (**c**).

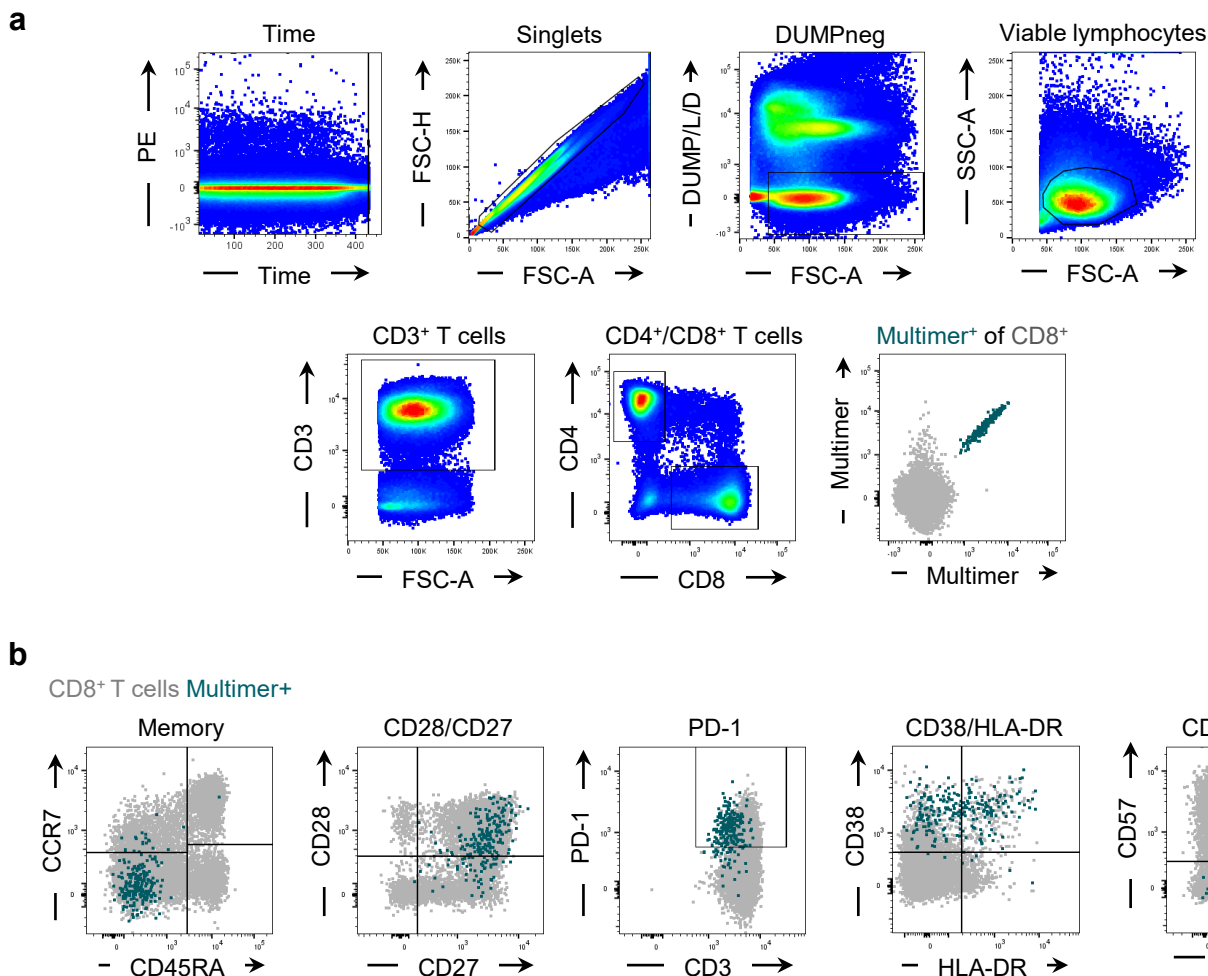

**Supplementary Figure 2 | Flow cytometry gating strategy for T cell specificity and subset analysis by flow cytometry.**

Gating strategy for identification and characterization of antigen-specific CD8<sup>+</sup> T cells in PBMC samples. **a**, Successive gates were applied to identify singlets, lymphocytes, DUMP (CD14, CD19, CD16 positive) and dead (L/D negative) cells, CD3<sup>+</sup> T cells, and CD4<sup>+</sup> or CD8<sup>+</sup> T cells. Antigen-specific CD8<sup>+</sup> T cells were gated as multimer double positive cells (green), with a combination of two fluorochromes labeling a defined MHC-epitope. **b**, Within CD8<sup>+</sup> T cells (grey), naïve (CD45RA<sup>+</sup>/CCR7<sup>+</sup>), central memory (CM; CD45RA<sup>-</sup>/CCR7<sup>+</sup>), effector memory (EM; CD45RA<sup>-</sup>/CCR7<sup>-</sup>) or effector (EMRA; CD45RA<sup>+</sup>/CCR7<sup>-</sup>) T cell subsets were gated, and activation status (CD38/HLA-DR), stages of differentiation (CD28/CD27) and expression of PD-1 or CD57 determined. Multimer<sup>+</sup> CD8<sup>+</sup> T cells are highlighted in green.
